# Supplementary material for: Optimization and Prediction of Mechanical and Thermal Properties of Graphene/LLDPE Nanocomposites by Using Artificial Neural Networks
Source: Hindawi journal article supplement (doi:10.1155/2016/5340252), 2016-01-01
Supplement: f1 [file 5340252.f1.pdf]

Supplementary documents

Supplementary table 1

Performance of different hidden neurons in the prediction of thermal conductivity

| No. of hidden neurons | 5       | 6       | 7       | 10      | 11      | 12      | 13      |
|-----------------------|---------|---------|---------|---------|---------|---------|---------|
| Training Results      |         |         |         |         |         |         |         |
| MSE                   | 7.7e-32 | 3.7e-04 | 3.2e-31 | 7.8e-05 | 7.1e-05 | 2.8e-04 | 2.4e-27 |
| R                     | 1       | 0.82    | 1       | 0.96    | 0.97    | 0.86    | 1       |
| Testing Results       |         |         |         |         |         |         |         |
| MSE                   | 7.3e-04 | 2.3e-04 | 9.4e-05 | 3.3e-04 | 2.1e-04 | 2.7e-04 | 3.1e-04 |
| R                     | 0.98    | 0.98    | 0.99    | 0.92    | 0.98    | 0.99    | 0.93    |

Supplementary table 2

Performance of different hidden neurons in the prediction of crystallization temperature

| No. of hidden neurons | 4       | 5     | 6      | 7     | 8      | 9      | 10      |
|-----------------------|---------|-------|--------|-------|--------|--------|---------|
| Training Results      |         |       |        |       |        |        |         |
| MSE                   | 5.67e-4 | .0958 | .9059  | .0088 | .1467  | .0333  | 7.34e-7 |
| R                     | .99     | .99   | .81    | .99   | .98    | .99    | 1       |
| Testing Results       |         |       |        |       |        |        |         |
| MSE                   | .0180   | .9545 | 1.1364 | .4585 | 2.5932 | 1.8180 | .6214   |
| R                     | .99     | .95   | .84    | .97   | .81    | .92    | .96     |
| No. of hidden neurons | 4       | 5     | 6      | 7     | 8      | 9      | 10      |
| Training Results      |         |       |        |       |        |        |         |

|                 |         |       |        |       |        |        |         |
|-----------------|---------|-------|--------|-------|--------|--------|---------|
| MSE             | 5.67e-4 | .0958 | .9059  | .0088 | .1467  | .0333  | 7.34e-7 |
| R               | .99     | .99   | .81    | .99   | .98    | .99    | 1       |
| Testing Results |         |       |        |       |        |        |         |
| MSE             | .0180   | .9545 | 1.1364 | .4585 | 2.5932 | 1.8180 | .6214   |
| R               | .99     | .95   | .84    | .97   | .81    | .92    | .96     |
| MSE             | .1175   | .4427 | 2.2391 | .5465 | 2.5598 | 1.4334 | .2301   |
| R               | .99     | .95   | .71    | .95   | .62    | .88    | .97     |
| Error           | .0966   | .7009 | .6678  | .4564 | 1.0118 | 1.0913 | .6261   |
| MSE             | .1175   | .4427 | 2.2391 | .5465 | 2.5598 | 1.4334 | .2301   |
| R               | .99     | .95   | .71    | .95   | .62    | .88    | .97     |
| Error           | .0966   | .7009 | .6678  | .4564 | 1.0118 | 1.0913 | .6261   |

Supplementary table 3

Performance of different hidden neurons in the prediction of degradation temperature

| No. of hidden neurons | 2      | 3      | 4      | 5            | 7       | 8       | 10     |
|-----------------------|--------|--------|--------|--------------|---------|---------|--------|
| Training Results      |        |        |        |              |         |         |        |
| MSE                   | 1.4656 | .8420  | .0468  | <b>.0222</b> | 1.28e-6 | 5.78e-4 | .2174  |
| R                     | .89    | .94    | .99    | .99          | 1       | .99     | .99    |
| Testing Results       |        |        |        |              |         |         |        |
| MSE                   | .2300  | 2.8703 | 1.4484 | <b>.8712</b> | 1.2145  | .9213   | 6.5410 |
| R                     | .99    | .93    | .97    | .99          | .99     | .99     | .88    |
| MSE                   | 2.4024 | 4.3940 | 5.4968 | <b>.7731</b> | 4.0496  | 2.1786  | 5.5315 |
| R                     | .98    | .92    | .96    | .99          | .94     | .96     | .89    |
| Error                 | .0842  | .2896  | .2435  | .1643        | .1919   | .1753   | .4016  |

Supplementary table 4

Performance of different hidden neurons in the prediction of tensile strength

| No. of hidden neurons | 5    | 6           | 7     | 10   | 11   | 12   | 13   |
|-----------------------|------|-------------|-------|------|------|------|------|
| Training Results      |      |             |       |      |      |      |      |
| MSE                   | 6.09 | <b>.138</b> | 20.87 | 5.49 | 2.39 | .45  | 3.13 |
| R                     | .68  | .99         | .35   | .81  | .90  | .98  | .87  |
| Testing Results       |      |             |       |      |      |      |      |
| MSE                   | 1.57 | <b>.989</b> | 7.64  | .95  | 1.07 | 1.99 | 9.83 |
| R                     | .92  | .91         | .70   | .94  | .82  | .94  | .56  |
